# Supplementary material for: Electron beam-induced deposition of platinum from Pt(CO)2Cl2 and Pt(CO)2Br2
Source: PubMed Central journal article supplement (PMC7705861; doi:10.3762/bjnano.11.161), 2020-11-27
Supplement: Beilstein_J_Nanotechnol-11-1789-s001.pdf [file Beilstein_J_Nanotechnol-11-1789-s001.pdf]

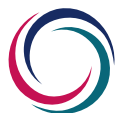

## Supporting Information

for

### **Electron beam-induced deposition of platinum from Pt(CO)<sub>2</sub>Cl<sub>2</sub> and Pt(CO)<sub>2</sub>Br<sub>2</sub>**

Aya Mahgoub, Hang Lu, Rachel M. Thorman, Konstantin Preradovic, Titel Jurca,  
Lisa McElwee-White, Howard Fairbrother and Cornelis W. Hagen

*Beilstein J. Nanotechnol.* **2020**, *11*, 1789–1800. [doi:10.3762/bjnano.11.161](https://doi.org/10.3762/bjnano.11.161)

## Additional experimental data

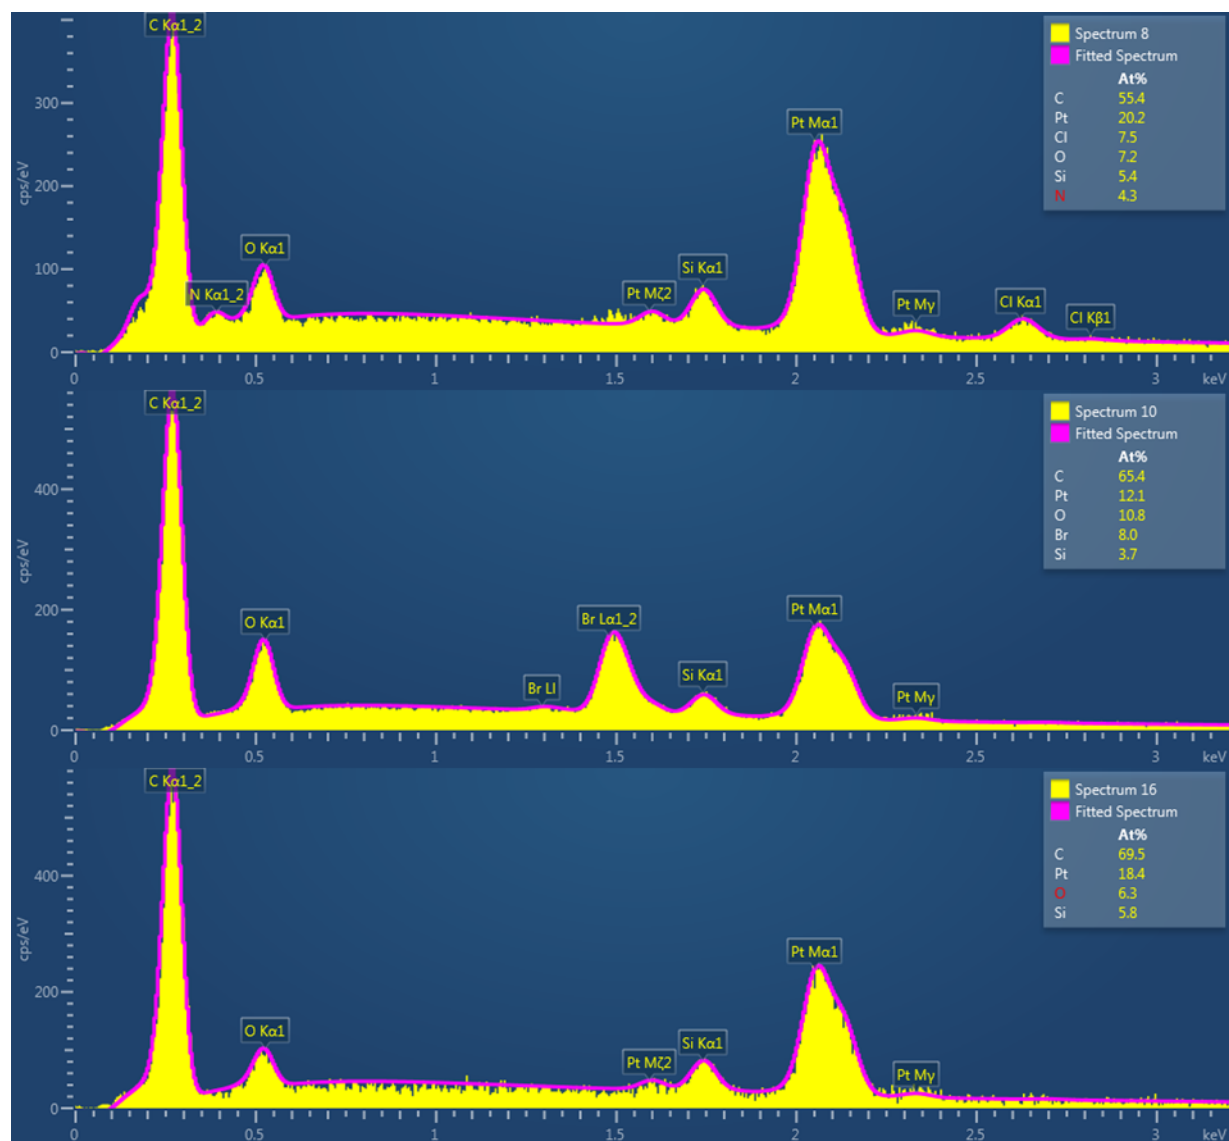

**Figure S1:** EDX spectra of deposits from the three platinum precursors. Top graph:  $\text{PtCl}_2(\text{CO})_2$ , middle graph:  $\text{PtBr}_2(\text{CO})_2$ , bottom graph:  $\text{MeCpPtMe}_3$ . The deposition was done before plasma cleaning the SEM chamber. All values are in atom %.

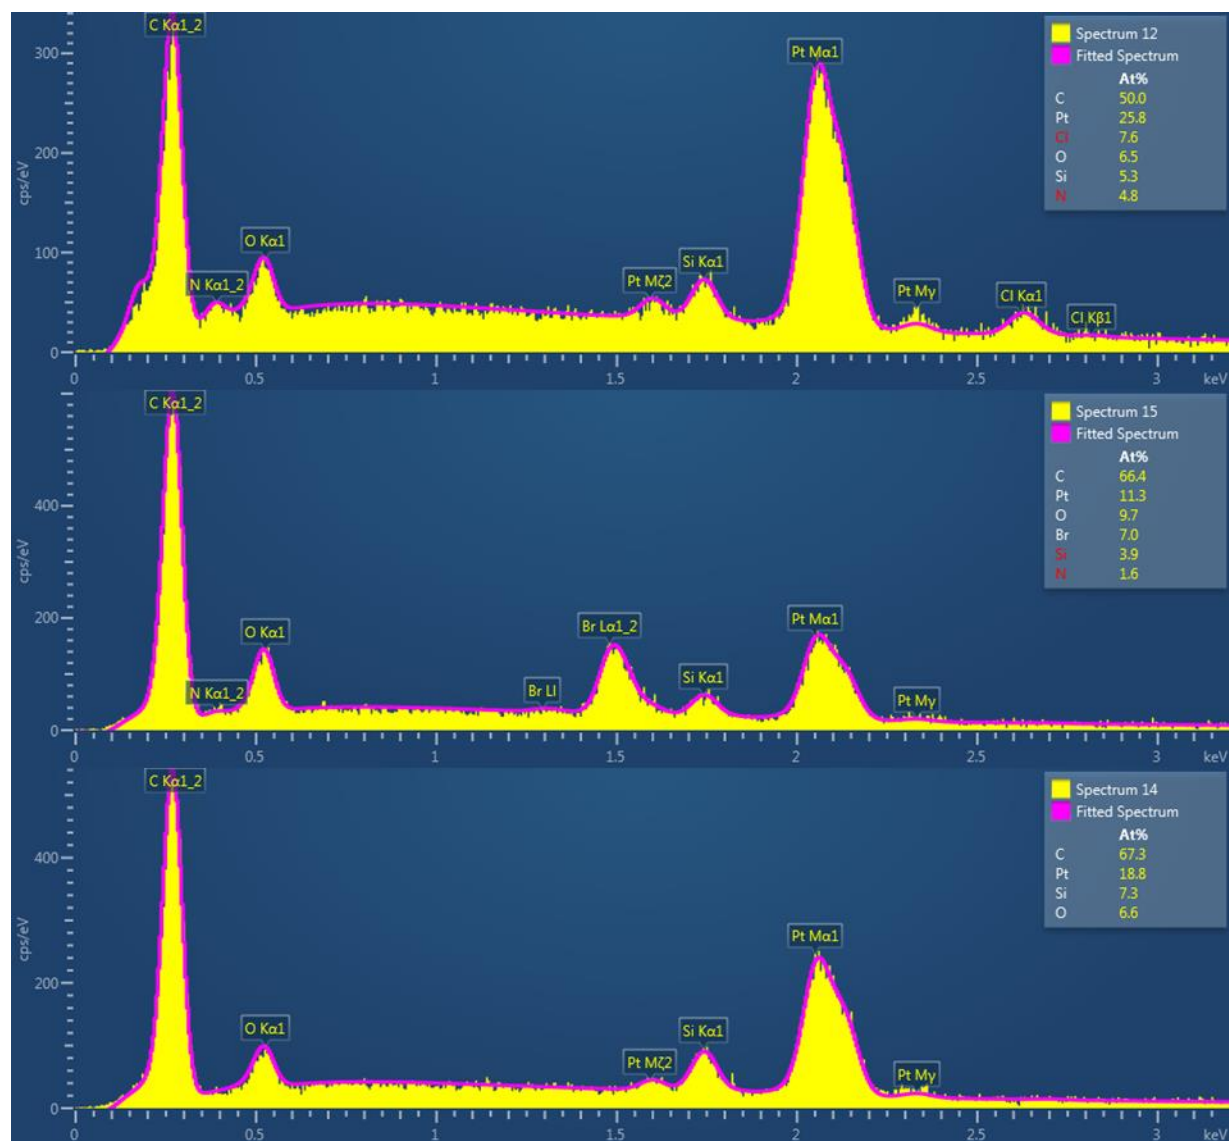

**Figure S2:** EDX spectra of deposits from the three platinum precursors. Top graph:  $\text{PtCl}_2(\text{CO})_2$ , middle graph:  $\text{PtBr}_2(\text{CO})_2$ , bottom graph:  $\text{MeCpPtMe}_3$ . The deposits were made after plasma cleaning the SEM chamber. All values are in atom %.

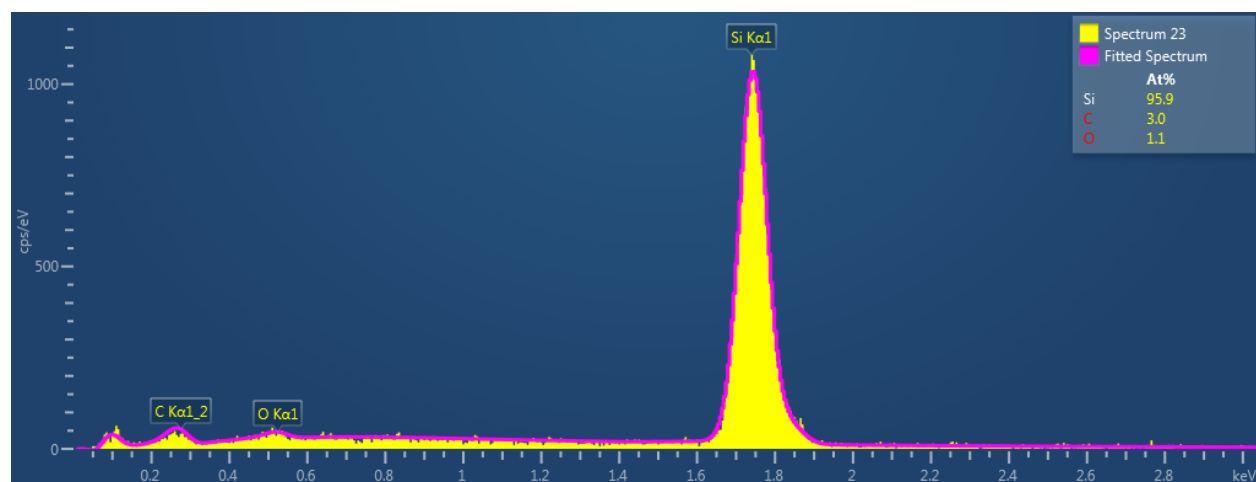

**Figure S3:** EDX spectrum of the Si substrate. All values are in atom %.

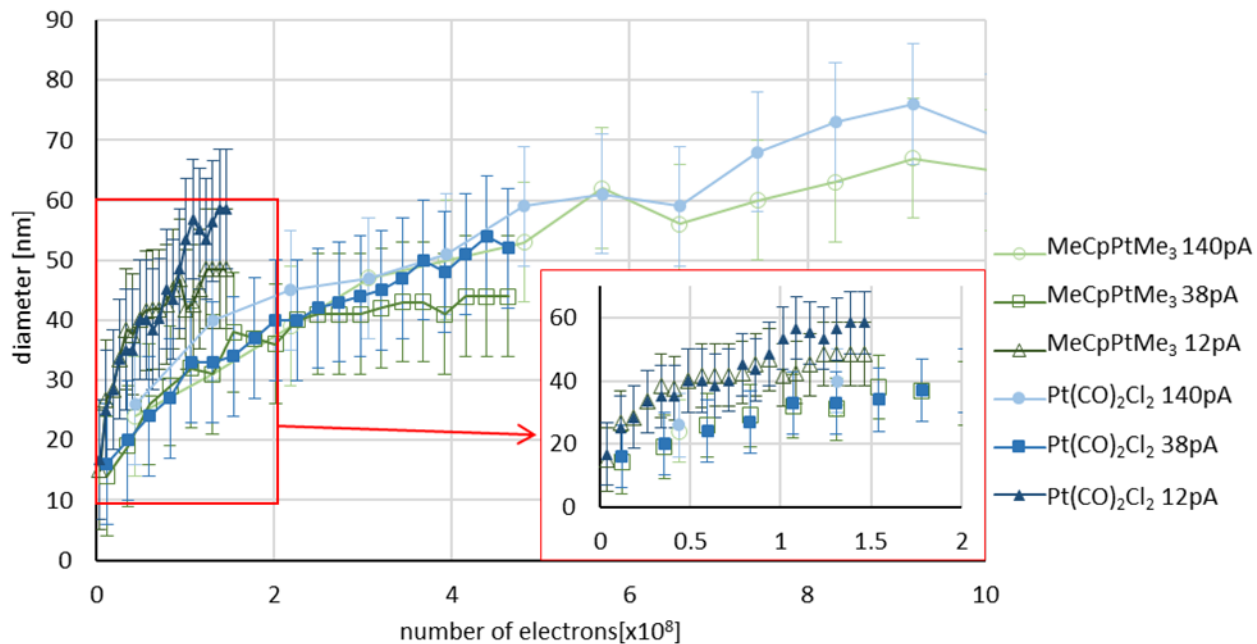

**Figure S4:** Pillar diameter versus number of electrons per pillar, for pillars deposited at 12, 38 and 140 pA from MeCpPtMe<sub>3</sub> (open symbols) and Pt(CO)<sub>2</sub>Cl<sub>2</sub> (closed symbols). The  $\pm 10$  nm error bars originate from size measurements taken manually from SEM images. The lines between the points serve as a guide to the eye and the inset shows an expansion of the data in the rectangular (red) area.

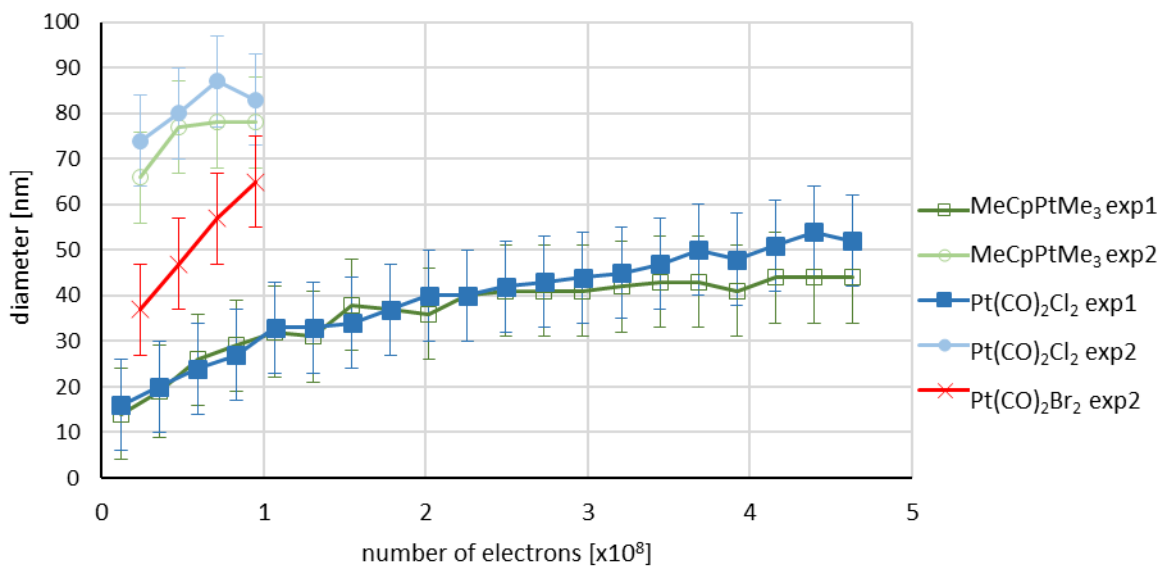

**Figure S5:** Pillar diameter versus number of electrons per pillar, for pillars deposited at 38 pA from MeCpPtMe<sub>3</sub>, Pt(CO)<sub>2</sub>Cl<sub>2</sub> and Pt(CO)<sub>2</sub>Br<sub>2</sub>. For comparison the graph also contains the diameters obtained from MeCpPtMe<sub>3</sub> and Pt(CO)<sub>2</sub>Cl<sub>2</sub> in experiment 1. The  $\pm 10$  nm error bars originate from size measurements taken manually from SEM images. The lines between the points serve as a guide to the eye.
